# Supplementary material
Source: PubMed Central journal article supplement (PMC9376071)
Supplement: 41467_2022_32531_MOESM3_ESM.pdf [file 41467_2022_32531_MOESM3_ESM.pdf]

## **Description of Additional Supplementary Files**

File Name: Supplementary Data 1

Description: Code for the iterative contact tracing model described in Supplementary Methods and visualised in Figure 8, Supplementary Fig. 8 and Supplementary Table 1.
